# Supplementary material for: The microbiomes of blowflies and houseflies as bacterial transmission reservoirs
Source: PubMed Central journal article supplement (PMC5701178; doi:10.1038/s41598-017-16353-x), 2017-11-24
Supplement: 41598_2017_16353_MOESM1_ESM.pdf [file 41598_2017_16353_MOESM1_ESM.pdf]

# Supplementary Materials

## The microbiomes of blowflies and houseflies as bacterial transmission reservoirs

Ana Carolina M. Junqueira, Aakrosh Ratan, Enzo Acerbi, Daniela I. Drautz-Moses, Balakrishnan N. V. Premkrishnan, Paul I. Costea, Bodo Linz, Rikky W. Purbojati, Daniel F. Paulo, Nicolas E. Gaultier, Poorani Subramanian, Nur A. Hasan, Rita R. Colwell, Peer Bork, Ana Maria L. Azeredo-Espin, Donald A. Bryant, Stephan C. Schuster

**Figures S1 to S14**

**Tables S1, S7, and S8**

**Supplementary data - Tables S2, S3, S4, S5, and S6**

**Legends for the supplementary excel format tables:**

**Supplementary Table S2.** Metadata of 116 samples of blowflies and houseflies and details of the data generated, filtered, and assigned by each bioinformatics method. Bit-score cutoffs for taxonomic assignment based on read length are also provided.

**Supplementary Table S3.** Species-level assignment of the microbiome of blowflies (*C. megacephala*) and houseflies (*M. domestica*) using dbAssign. Detailed information about number of normalized reads assigned to each bacterial species in each fly sample.

**Supplementary Table S4.** Species-level assignment of the microbiome of blowflies (*C. megacephala*) and houseflies (*M. domestica*) using rapsearch2. Detailed information on number of normalized reads assigned to each microbial species in each fly sample.

**Supplementary Table S5.** Species identification of the microbiomes of blowflies (*C. megacephala*) and houseflies (*M. domestica*) using specI. Detailed information about number of normalized reads assigned to each microbial species in each fly sample.

**Supplementary Table S6.** Summary of the bacterial species assigned by the dbAssign toolset, indicating shared and unique species in blowflies and houseflies.

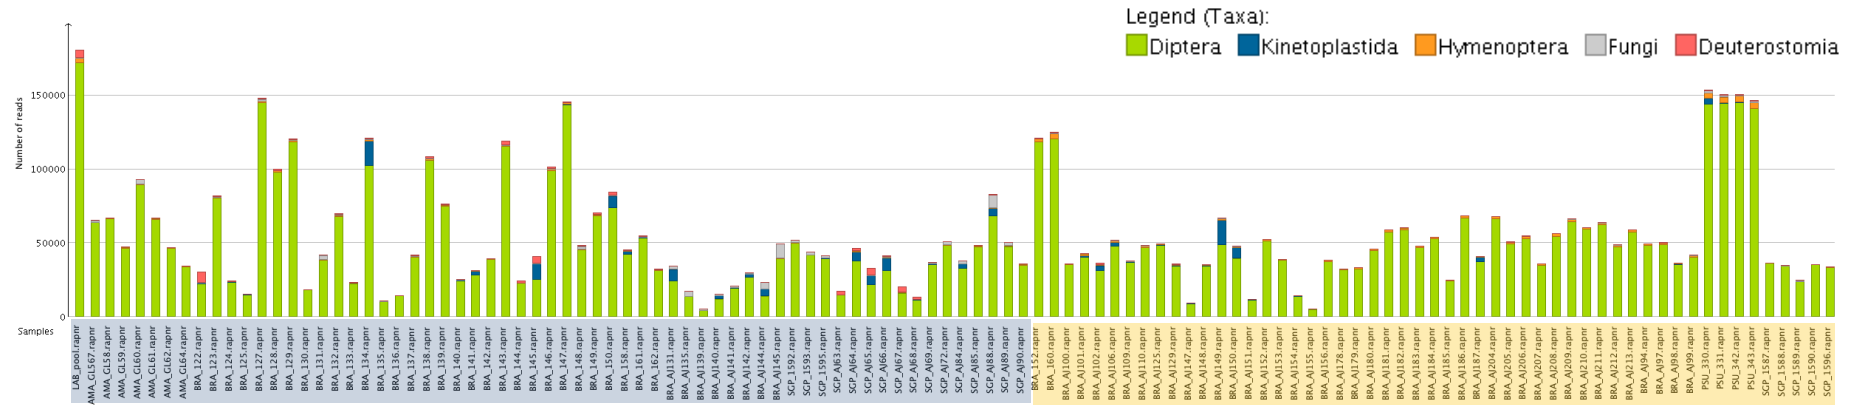

**Supplementary Figure S1.** Categories of reads assigned to Eukaryotes domain using rapsearch2 against the non-redundant NCBI database, showing that most matched to fly species of the order Diptera, thus revealing the reads that passed host-genome filtering. Blowflies are highlighted in blue and houseflies in yellow.

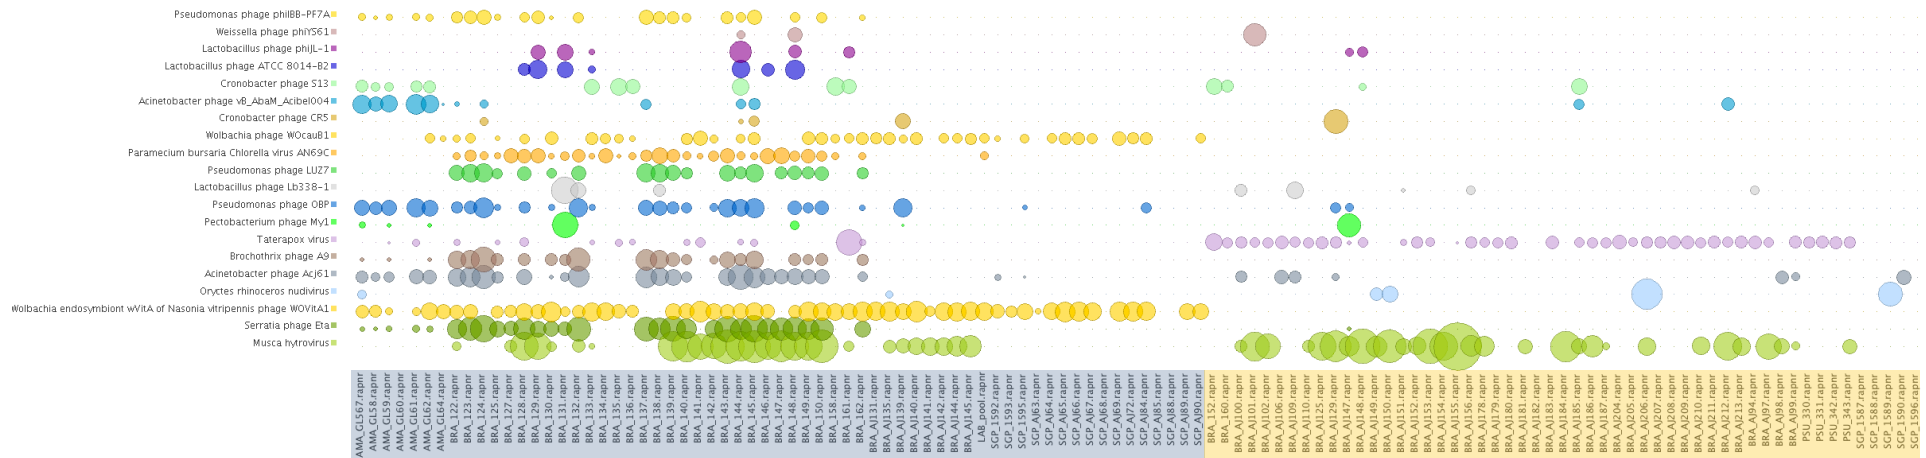

**Supplementary Figure S2.** The most frequently identified twenty viruses assigned from metagenomics datasets of 116 blowflies and houseflies using the rapsearch2 against the non-redundant NCBI database. Blowflies are highlighted in blue and houseflies in yellow. The bubble size is log-scaled and refers to the normalized number of reads.

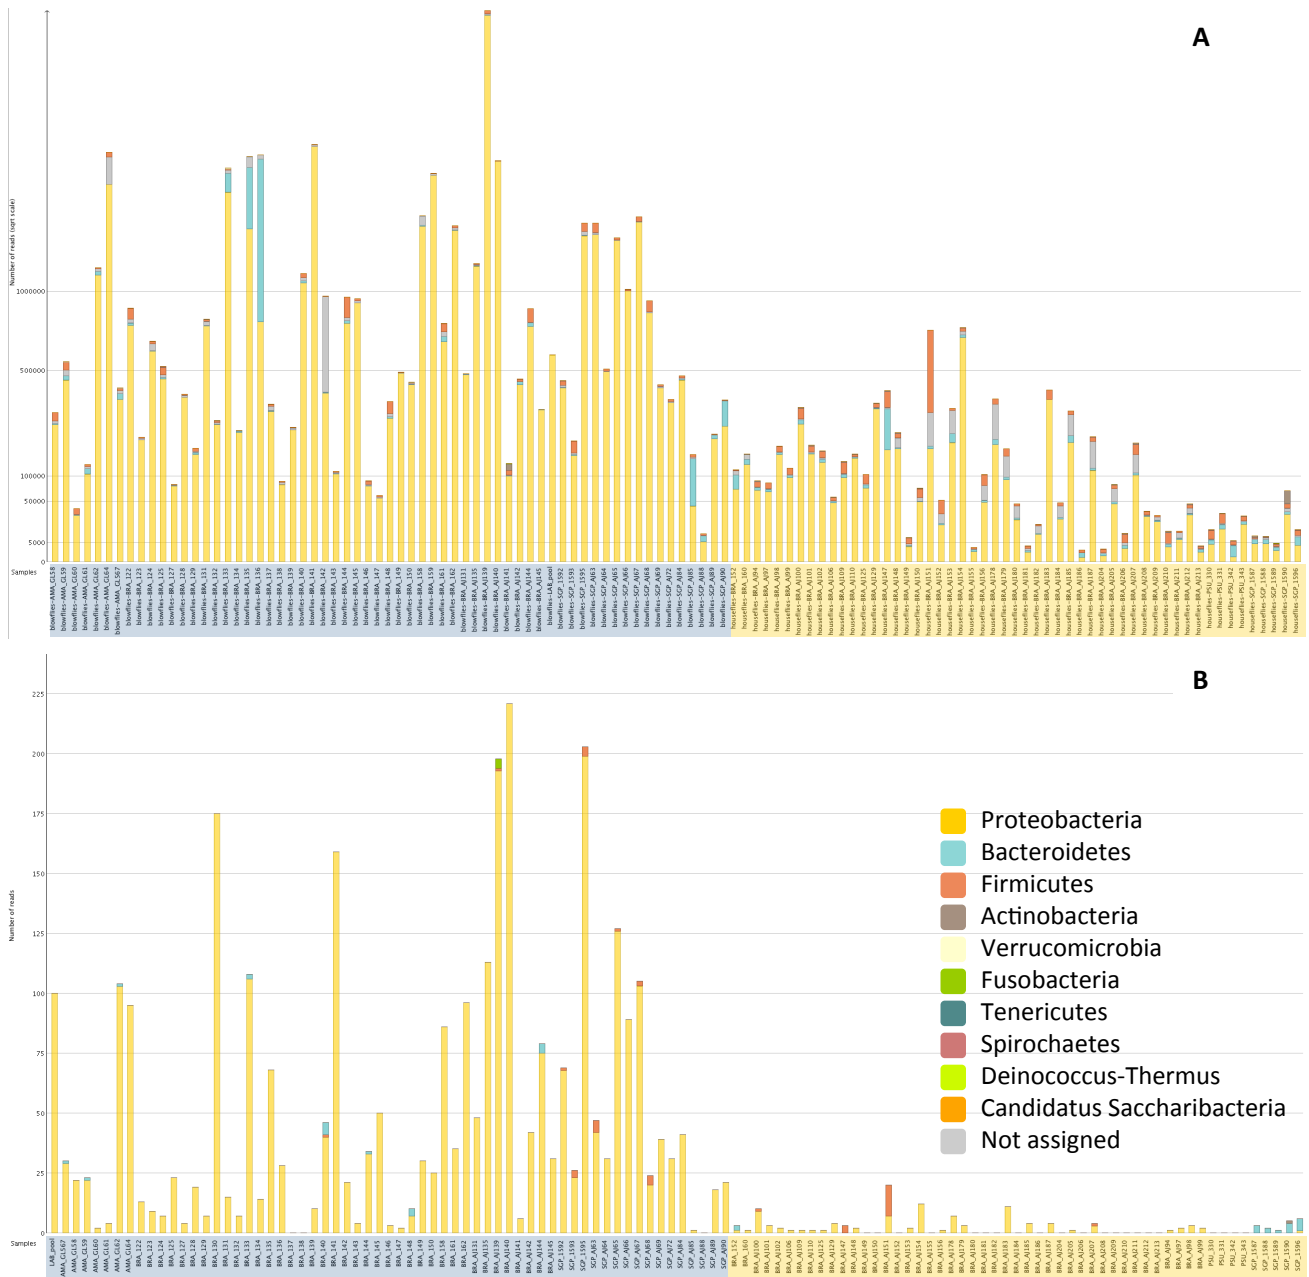

**Supplementary Figure S3.** Phylum-level assignment of normalized metagenomic datasets with different bioinformatics methods. **(A)** reads assigned against the complete bacterial genomes database from NCBI using in-house developed script dbAssign. **(B)** reads assigned using spec clusters of 40 single universal genes. Proteobacteria, Bacteroidetes and Firmicutes are the most abundant phyla described in the blowfly *Chrysomya megacephala* (blue shadow) and in the housefly *Musca domestica* (yellow shadow).

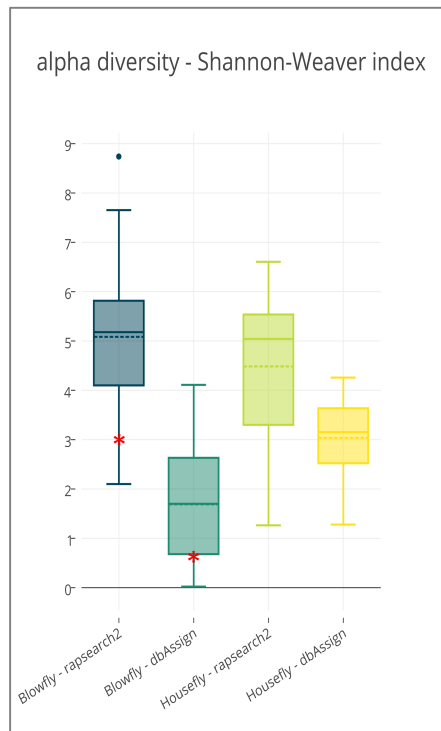

**Supplementary Figure S4.** Diversity of bacterial taxa in blowflies and houseflies. Boxplots show distribution of alpha-diversity (Shannon-Weaver index) found in 116 samples. Solid line refers to median and dashed line to mean values. Whiskers represent minimum and maximum values. Individual points represent outlier and asterisk indicates alpha-diversity of the lab-reared pool of blowflies serving as control (values of 3.004 for rapsearch2 and 0.576 for dbAssign). Full data are available in Supplementary Tables S2 and S3. Different databases used for rapsearch2 (nr) and dbAssign (bacterial complete genomes) provided different bacterial diversity for blowflies and houseflies. dbAssign recovered less diversity (blowflies=1.69; houseflies= 3.15) than rapsearch2 (blowflies=5.18; houseflies= 5.04) due to different stringencies used for read mapping parameters and different databases.

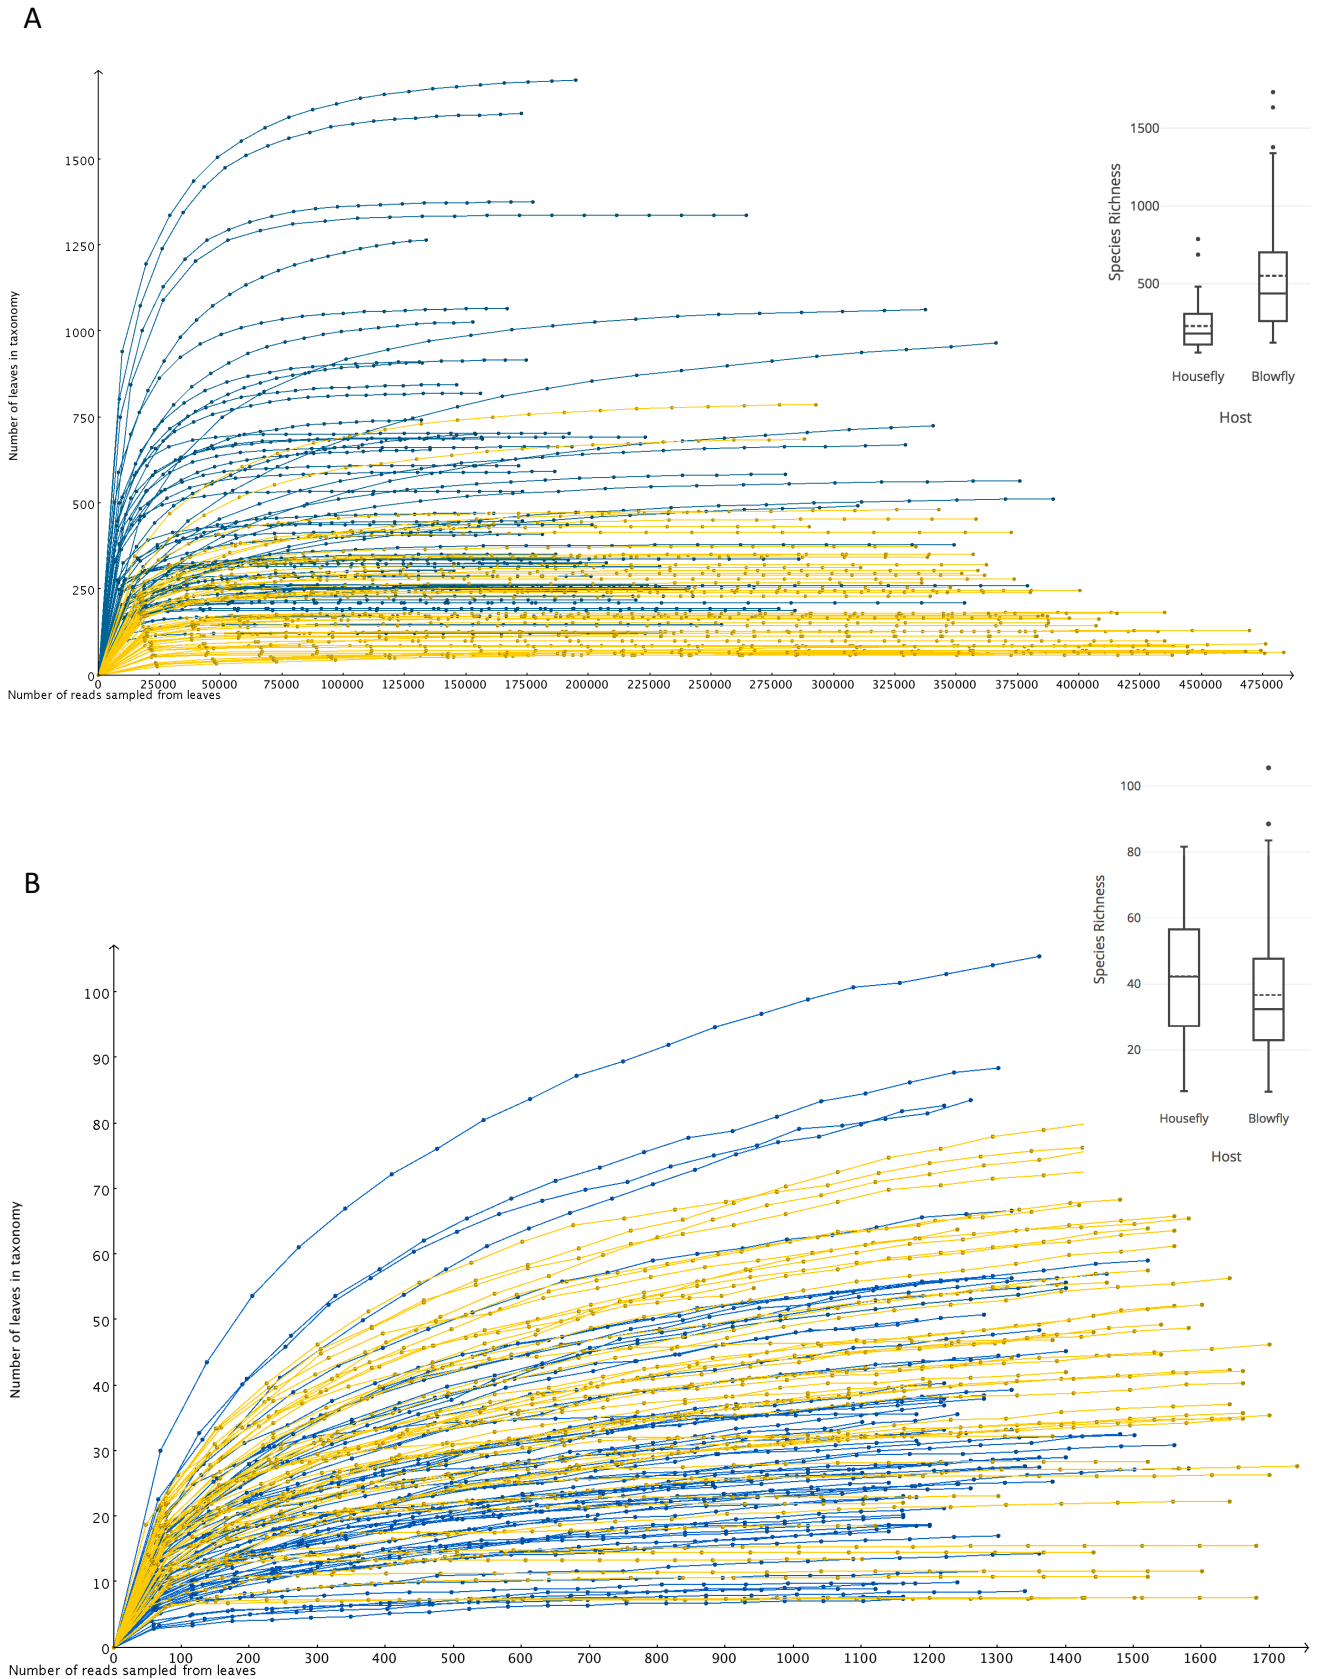

**Supplementary Figure S5.** Rarefaction curves of all blowflies (blue lines) and houseflies (yellow lines) analyzed with rapsearch2 (**A**) and dbAssign (**B**). The OTU discovery levels off around 25,000 reads sampled with rapsearch2 and around 500 reads for dbAssign, reflecting differences in databases used and alignment stringency. The boxplots in the right upper corners shows the OTU richness per host species, compiling the total number of observed bacterial species assigned for the two vectors. Solid line refers to median and dashed line to mean values. Whiskers represent minimum and maximum values. Individual points represent outliers.

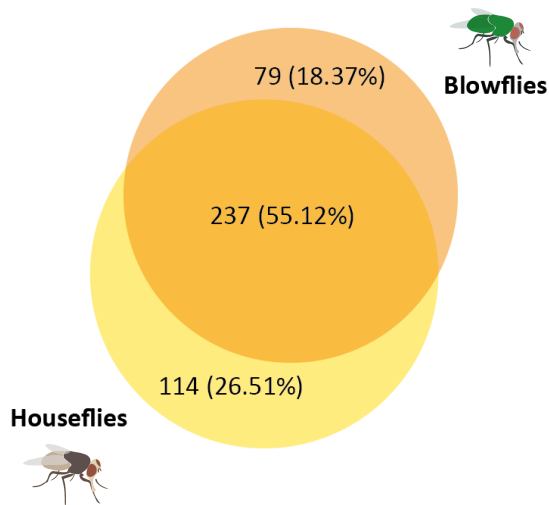

**Supplementary Figure S6.** Venn diagram indicating that more than 50% of the microbiome of houseflies and blowflies is shared.

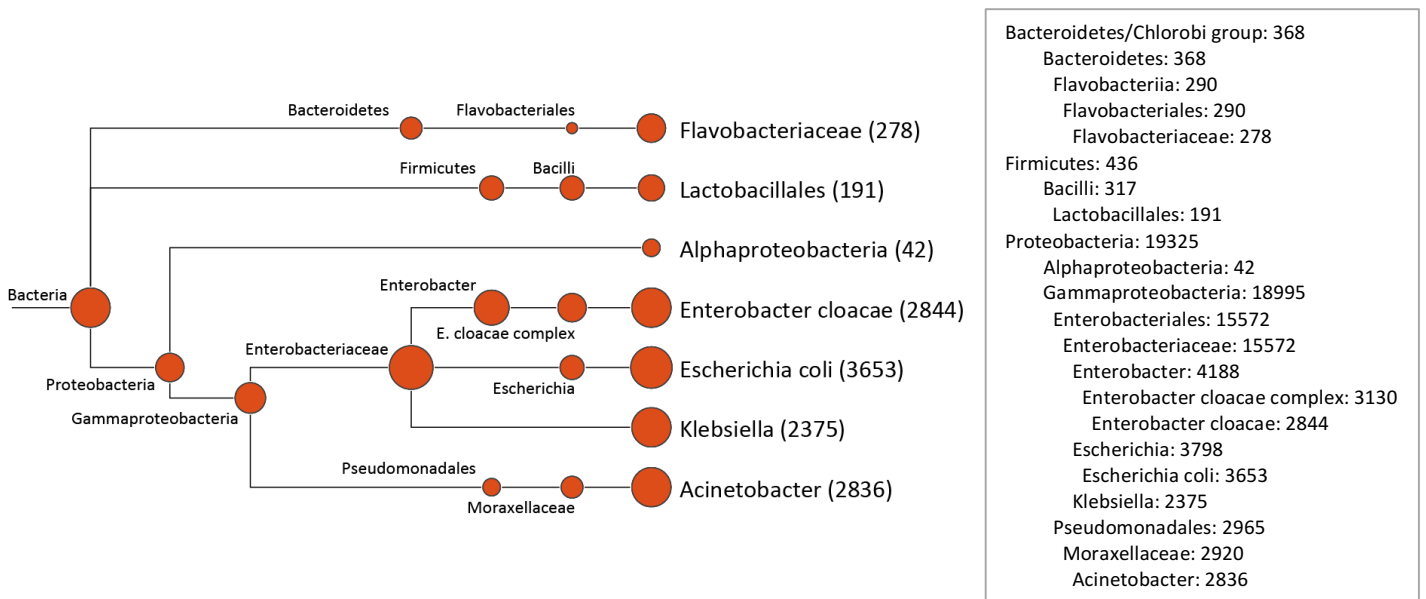

**Supplementary Figure S7.** The core microbiome of *C. megalcephala* and *M. domestica* (dbAssign taxa assignment output). All taxa listed refer to those present in more than 80% of flies analysed. The number of reads assigned to terminal nodes are inside the brackets. Bubble size indicates abundance of reads at different taxonomic levels (log-scaled) and the box describes all reads assigned to different taxonomic levels in the core microbiome.

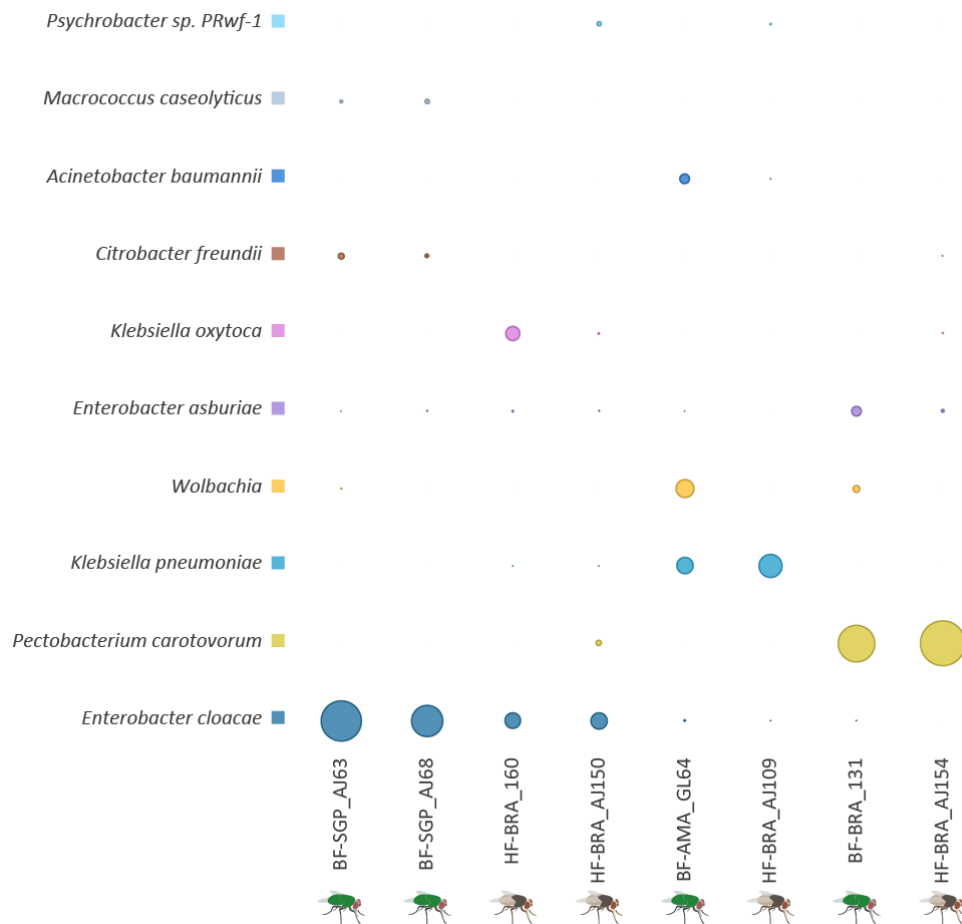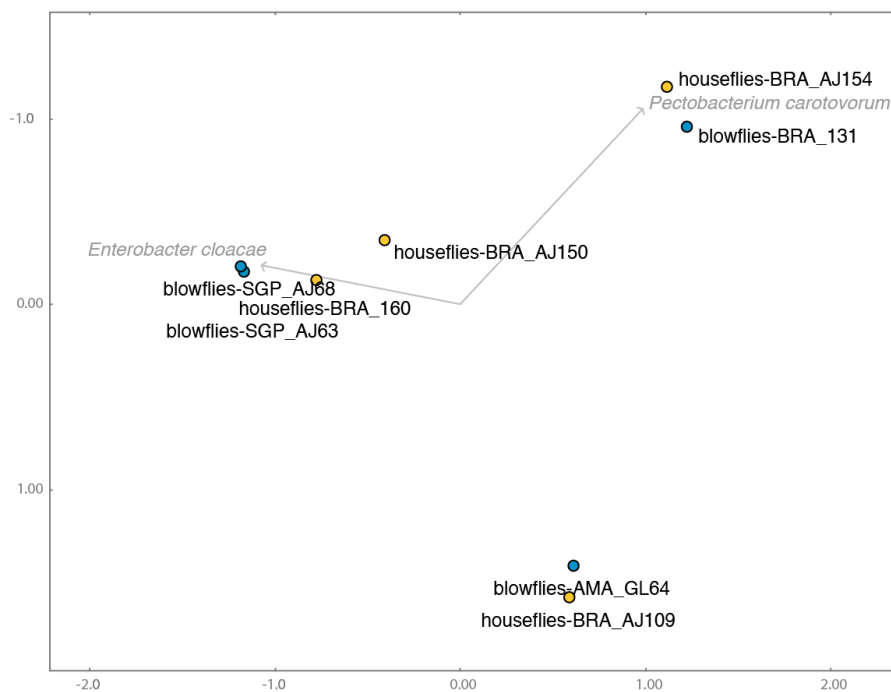

**Supplementary Figure S8.** Top 10 bacterial species of blowfly and housefly samples that could not be separated with clustering analyses based on their full microbiomes. The blowflies show a low amount of *Wolbachia* spp. compared to other blowfly samples and higher amounts of *E. cloacae*, *K. pneumoniae* or *P. carotovorum*. The PCoA shows main factors driving clustering of these samples.

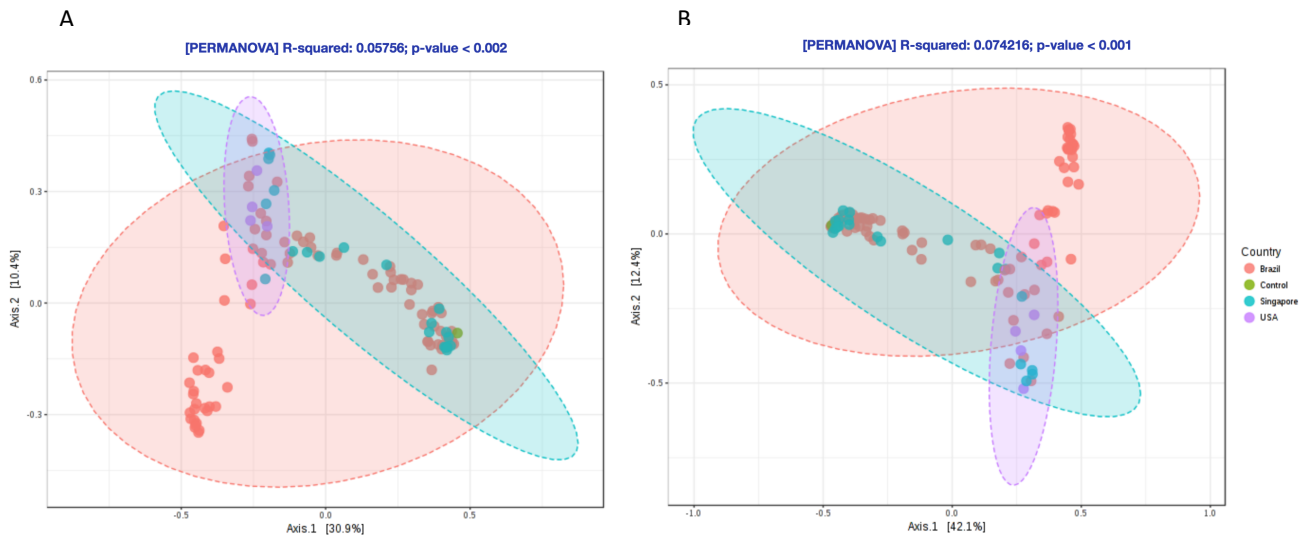

**Supplementary Figure S9.** PCoA plots of the beta-diversity of microbiome of individual blowflies and houseflies. Samples are coloured based on geographical origin of the samples. The geographic origin of samples had a minor effect on the segregation of flies and explains a small proportion of the beta-diversity variation found with rapsearch2 (A) and dbAssign (B). R-squared and p-values are shown above the plots. PCoA and PERMANOVA were generated with the normalized datasets using ‘species’ taxonomic rank with Bray-Curtis index.

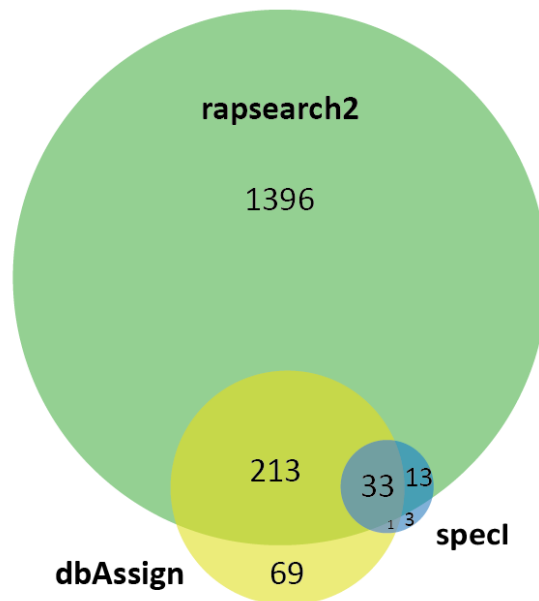

**Supplementary Figure 10.** Comparison of methods used for OTU assignment. Venn diagram showing the number of OTUs assigned to species by three different bioinformatics approaches. Only high-confidence paired-end reads that were mapped above 97% identity are represented by the spec1 circle (total of 50 OTUs) and only OTUs with more than 500 mapped reads were considered for analysis with rapsearch2 (1,655 microbial species) and dbAssign (316 prokaryotic species) comparison. A total of 33 bacterial species were identified by all 3 methods and are listed in Table S7.



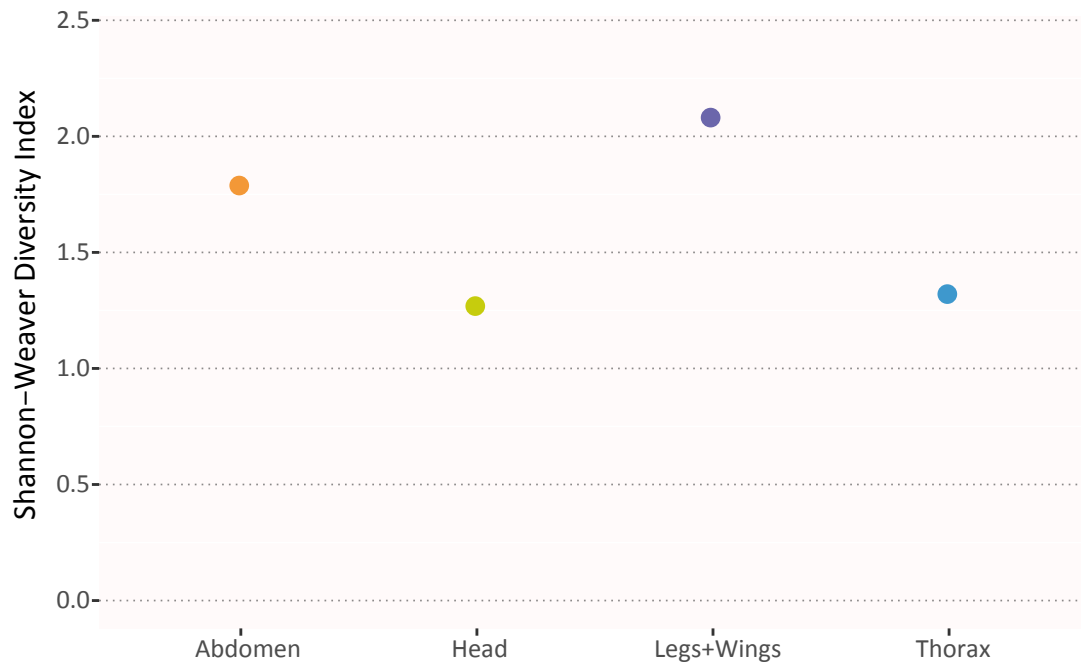

**Supplementary Figure S11.** Alpha-diversity of bacterial species assigned to the microbiome of four body parts of the blowfly (Shannon-Weaver diversity index). Legs+wings harbor the highest bacterial diversity, despite the least number of reads generated, compared to head, thorax and abdomen. This is particularly important in establishing the role of the outer body as the main route of bacterial dispersal by mechanical vectors. Fungi, archaea and viruses show a low diversity and were not detected in most of the flies analyzed, as well as in the four body parts.

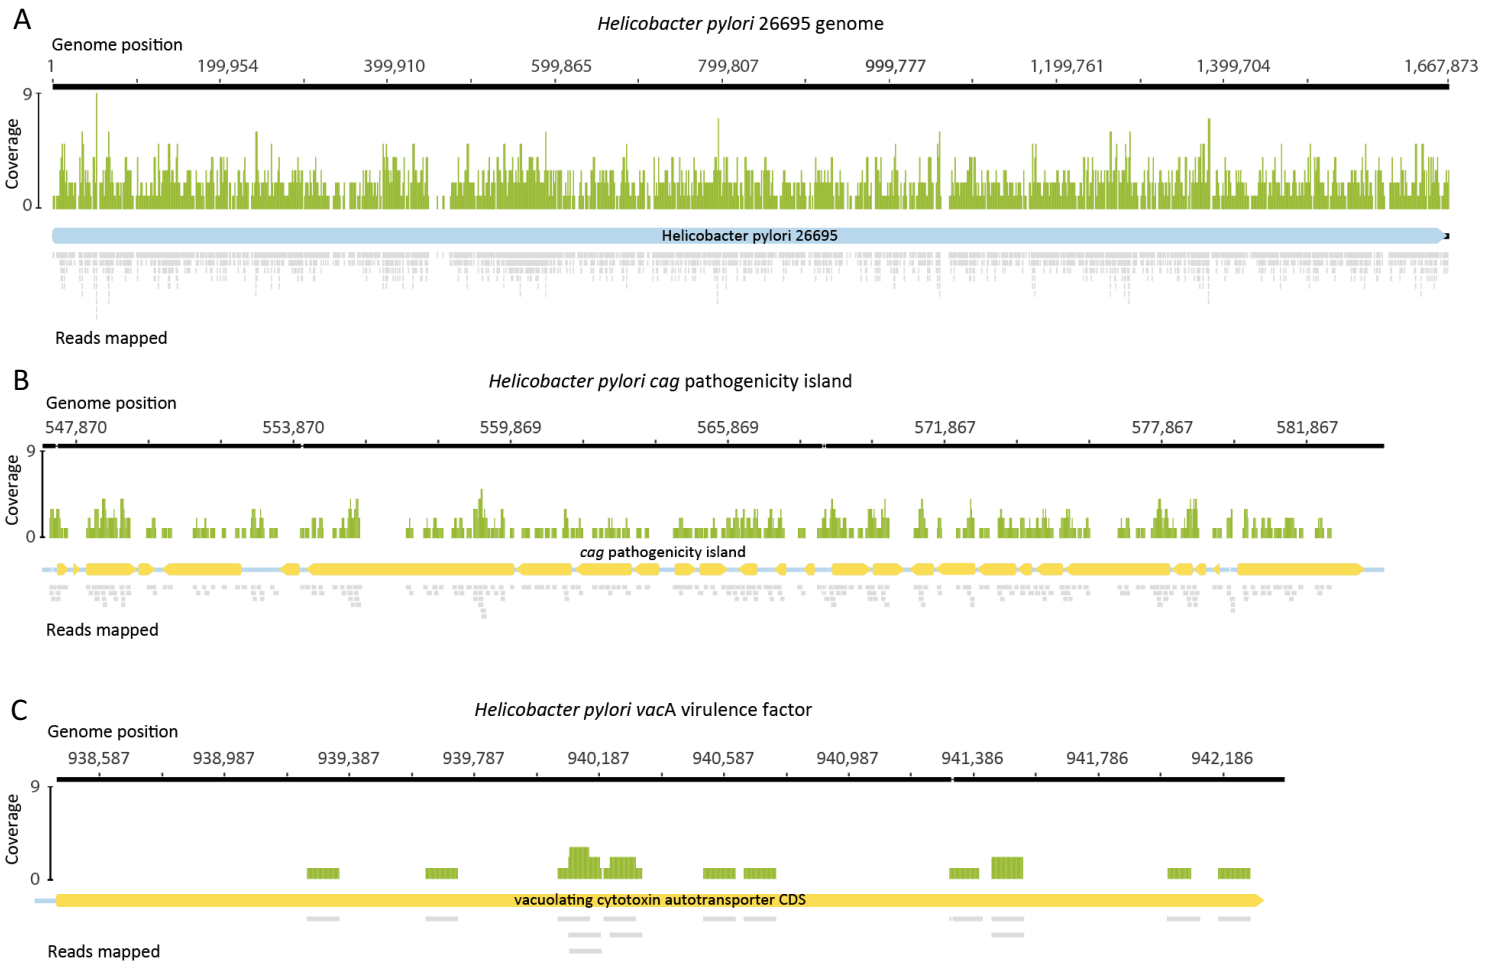

**Supplementary Figure S12.** *Helicobacter pylori* genome coverage by metagenomic reads. **(A)** Reads assigned to the genus *Helicobacter* spp. were extracted from the four body parts in the dbAssign output and mapped against *H. pylori* strain 26695 reference genome (NC\_000915.1). A total of 5,890 reads were mapped using bowtie 1.1.2 (default parameters), covering 25.3% of the reference genome. **(B)** Metagenomic reads covering the gene cluster in the *cag* pathogenicity island. A total of 18,281 identical sites were mapped with pairwise identity of 97.9%. **(C)** Metagenomic reads covering the *vacA* virulence factor of *H. pylori*. The length of the region analysed is 3,019 bp (partial *vacA* gene), with 966 identical sites covered with pairwise identity of 95.6%.

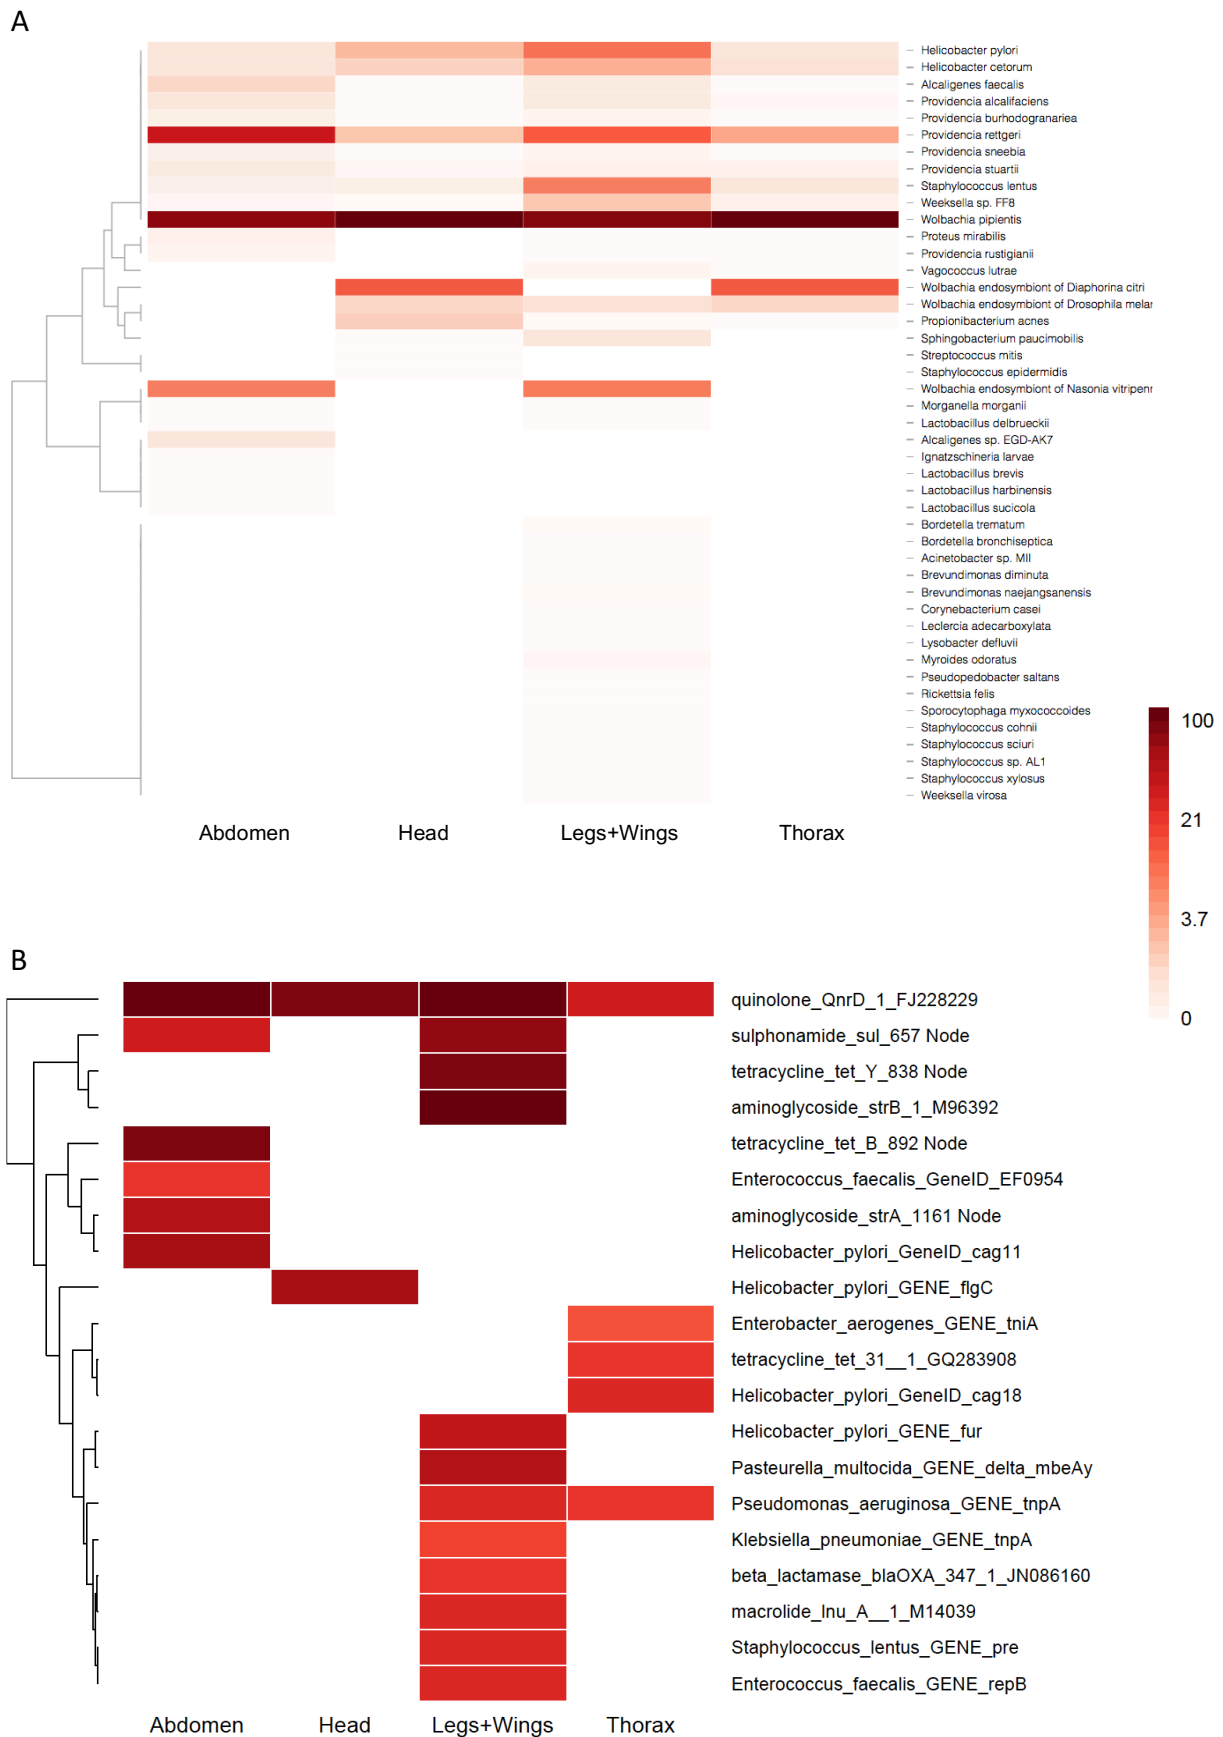

**Supplementary Figure S13. (A)** Metagenomic and **(B)** virulence factors screening of the four body parts using CosmosID metagenomics software package. Both analyses corroborate the dbAssign findings and also indicate presence of *H. pylori* in the four body parts of the fly, mostly concentrated in the legs+wings tissues.

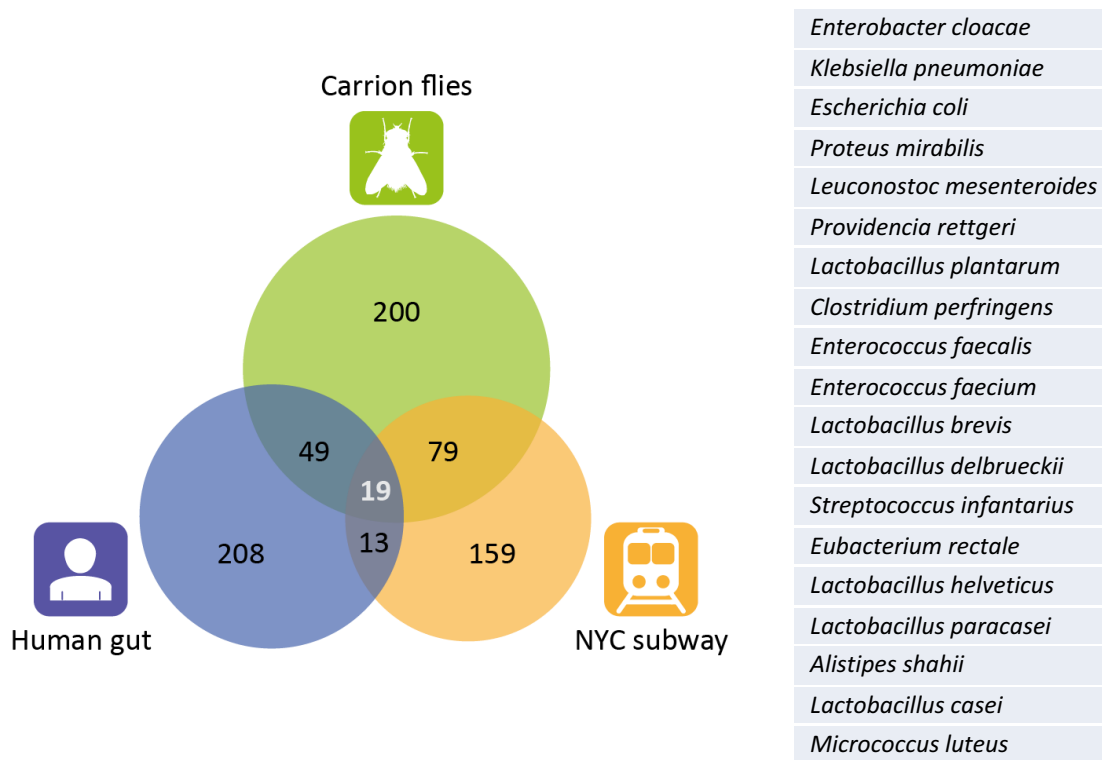

**Figure S14.** Overlapping of bacterial species among the carrion flies microbiomes, human gut microbiomes project (data from the gastrointestinal tract downloaded from <http://hmpdacc.org/catalog/>) and the urban microbiome conducted in the New York City subway system (NYC subway). The highlighted table lists 19 bacterial species that overlap all three microbiome projects.

**Supplementary Table S1.** Summary of the average number of reads generated and assigned per sample. The lab pool containing 98 individual flies reared in a controlled environment was not included in the summary.

| Fly species | Average number of reads per sample |                |                        |                      |                   |
|-------------|------------------------------------|----------------|------------------------|----------------------|-------------------|
|             | Total of reads                     | Non-host reads | Assigned by rapsearch2 | Assigned by dbAssign | Assigned by specI |
| Blowfly     | 69,980,118.4                       | 25,990,875.2   | 1,503,825.2            | 812,787.9            | 50.0              |
| Housefly    | 44,834,740.9                       | 25,888,798.7   | 343,073.0              | 115,935.7            | 2.3               |

**Supplementary Table S7.** List of 33 bacterial species identified by all three bioinformatics methods used for comparative analyses of the microbiome of 116 individuals of blowflies and houseflies. The use of *specl* as representative of species clusters allowed for identification of bacterial species and strains, enabling further investigation of potential sources of transmission and disease association (PATRIC database).

| Species identification (3 methods)      | Strain identification (spec)                                   | Habitat                                                                      | PATRIC disease association                             | Host association          |
|-----------------------------------------|----------------------------------------------------------------|------------------------------------------------------------------------------|--------------------------------------------------------|---------------------------|
| <i>Bacillus thuringiensis</i>           | <i>Bacillus thuringiensis</i> serovar chinensis CT-43          | Insects (mainly dipterans and lepidoterans)                                  | None                                                   |                           |
| <i>Wolbachia Culex quinquefasciatus</i> | <i>Wolbachia</i> endosymbiont of <i>Culex quinquefasciatus</i> | Endosymbiont - mosquito                                                      | None                                                   | Insect-associated         |
| <i>Wolbachia sp wRi</i>                 | <i>Wolbachia pipientis</i> wRi                                 | Endosymbiont - fly                                                           | None                                                   |                           |
| <i>Acinetobacter johnsonii</i>          | <i>Acinetobacter johnsonii</i> SH046                           | Soil, water                                                                  | None; rare nosocomial diseases                         |                           |
| <i>Aeromonas veronii</i>                | <i>Aeromonas veronii</i> B565                                  | Aquaculture pond sediment                                                    | None                                                   |                           |
| <i>Bacteroides coprosuis</i>            | <i>Bacteroides coprosuis</i> DSM 18011                         | Swine feces                                                                  | None                                                   |                           |
| <i>Klebsiella oxytoca</i>               | <i>Klebsiella oxytoca</i> KCTC 1686                            | Ubiquitous and opportunistic in nature.                                      | None                                                   |                           |
| <i>Klebsiella pneumoniae</i>            | <i>Klebsiella pneumoniae</i> 342                               | Maize                                                                        | None                                                   |                           |
| <i>Kocuria rhizophila</i>               | <i>Kocuria rhizophila</i> DC2201                               | Rhizosphere of narrowleaf cattail                                            | None                                                   | Environmental,            |
| <i>Lactobacillus acidophilus</i>        | <i>Lactobacillus acidophilus</i> NCFM                          | Gastrointestinal tract                                                       | None                                                   | plant,                    |
| <i>Lactococcus lactis</i>               | <i>Lactococcus lactis</i> subsp. <i>lactis</i> KF147           | Mung bean sprouts                                                            | None                                                   | animal or                 |
| <i>Macrococcus caseolyticus</i>         | <i>Macrococcus caseolyticus</i> JCSC5402                       | Animal meat, cow's milk, bovine organs and food-processing factories         | None                                                   | human-associated          |
| <i>Psychrobacter sp PRwf 1</i>          | <i>Psychrobacter sp.</i> PRwf-1                                | Food spoilage                                                                | None                                                   |                           |
| <i>Psychrobacter cryohalolentis</i>     | <i>Psychrobacter cryohalolentis</i> K5                         | Permafrost soils                                                             | None                                                   |                           |
| <i>Psychrobacter arcticus</i>           | <i>Psychrobacter arcticus</i> 273-4                            | Permafrost soils                                                             | None                                                   |                           |
| <i>Serratia proteamaculans</i>          | <i>Serratia proteamaculans</i> 568                             | Plant - Poplar endophyte                                                     | Pneumonia (one case reported)                          |                           |
| <i>Aeromonas salmonicida</i>            | <i>Aeromonas salmonicida</i> subsp. <i>salmonicida</i>         | Aquatic                                                                      | Furunculosis in fish                                   | potential fish pathogen   |
| <i>Lactococcus garvieae</i>             | <i>Lactococcus garvieae</i> Lg2                                | Fish                                                                         | Lactococcosis in fish                                  |                           |
| <i>Pectobacterium carotovorum</i>       | <i>Pectobacterium carotovorum</i> subsp. <i>carot</i>          | Plants (wide host range)                                                     | Soft rot                                               |                           |
| <i>Pectobacterium atrosepticum</i>      | <i>Pectobacterium atrosepticum</i> SCRI1043                    | Potato stem                                                                  | Soft rot                                               | potential plant pathogen  |
| <i>Pectobacterium wasabiae</i>          | <i>Pectobacterium wasabiae</i> WPP163                          | Potato                                                                       | Soft rot                                               |                           |
| <i>Acinetobacter lwoffii</i>            | <i>Acinetobacter lwoffii</i> SH145                             | Skin                                                                         | Nosocomial diseases                                    |                           |
| <i>Acinetobacter nosocomialis</i>       | <i>Acinetobacter nosocomialis</i> RUH2624                      | Skin                                                                         | None; nosocomial diseases                              | Opportunistic             |
| <i>Bacteroides vulgatus</i>             | <i>Bacteroides vulgatus</i> ATCC 8482                          | Human gastrointestinal tract                                                 | Peritonitis                                            | pathogens                 |
| <i>Enterobacter cloacae</i>             | <i>Enterobacter cloacae</i> subsp. <i>cloacae</i>              | ATC Human gastrointestinal tract. Also found in water, sewage, soil and food | Nosocomial diseases                                    | of animals and            |
| <i>Providencia rettgeri</i>             | <i>Providencia rettgeri</i> DSM 1131                           | Water, soil, human gastrointestinal tract                                    | Gastroenteritis                                        | humans                    |
| <i>Providencia stuartii</i>             | <i>Providencia stuartii</i> ATCC 25827                         | Oil, water, and sewage                                                       | Urinary tract infection, septicaemia                   |                           |
| <i>Acinetobacter baumannii</i>          | <i>Acinetobacter baumannii</i> TCDC-AB0715                     | Multiple                                                                     | Nosocomial diseases, bacteraemia                       |                           |
| <i>Aeromonas hydrophila</i>             | <i>Aeromonas hydrophila</i> subsp. <i>hydrophila</i>           | Water                                                                        | Gastroenteritis, septicaemia                           |                           |
| <i>Enterococcus faecalis</i>            | <i>Enterococcus faecalis</i> V583                              | Multiple                                                                     | Bacteraemia, endocarditis, urinary tract infection     |                           |
| <i>Erysipelothrix rhusiopathiae</i>     | <i>Erysipelothrix rhusiopathiae</i> str. Fujisawa              | Soil, food scraps and water contaminated by infected animals                 | Erysipelas, erysipeloid                                | potential human pathogens |
| <i>Escherichia coli</i>                 | <i>Escherichia coli</i> O26:H11 str. 11368                     | Multiple                                                                     | Hemorrhagic colitis                                    |                           |
| <i>Proteus mirabilis</i>                | <i>Proteus mirabilis</i> HI4320                                | Human urinary tract                                                          | Encephalitis, urinary tract infection, pyelonephritis, |                           |

**Supplementary Table S8.** Identification and relative abundance of the bacterial strains in the metagenomes of the four body parts (head, thorax, abdomen and legs+wings) using the CosmosID metagenomics software package. Only those bacterial strains identified with confidence and above threshold are listed.

| Body part                                     | Bacterial strain                                           | Unique Matches | Frequency | Unique Matches | % Unique Matches | % Total Matches | Relative Abundance |
|-----------------------------------------------|------------------------------------------------------------|----------------|-----------|----------------|------------------|-----------------|--------------------|
| Head                                          | <i>Wolbachia_pipientis_wBol1_b</i>                         | 148046         | 2179      | 21.18          | 55.95            | 81.22           |                    |
|                                               | <i>Wolbachia_endosymbiont_of_Diaphorina_citri</i>          | 47849          | 736       | 3.28           | 27.11            | 10.58           |                    |
|                                               | <i>Helicobacter_pylori_16354</i> Branch                    | 354            | 322       | 10.25          | 10.31            | 2.29            |                    |
|                                               | <i>Providencia_rettgeri_DSM_1131</i>                       | 20461          | 17927     | 9.11           | 9.57             | 1.68            |                    |
|                                               | <i>Propionibacterium_acnes_Type1A2_P_acn17</i>             | 14             | 14        | 1.81           | 8.28             | 1.34            |                    |
|                                               | <i>Helicobacter_cetorum_MIT_00_7128</i>                    | 7370           | 6069      | 7.57           | 7.61             | 1.2             |                    |
|                                               | <i>Wolbachia_24169</i> Branch                              | 1476           | 21        | 0.64           | 0.37             | 1.12            |                    |
|                                               | <i>Staphylococcus_lentus_F1142</i>                         | 2834           | 2487      | 1.71           | 1.70             | 0.24            |                    |
| Thorax                                        | <i>Wolbachia_pipientis_wBol1_b</i>                         | 127523         | 2174      | 21.13          | 55.89            | 82.6            |                    |
|                                               | <i>Wolbachia_endosymbiont_of_Diaphorina_citri</i>          | 41906          | 706       | 3.15           | 26.99            | 10.58           |                    |
|                                               | <i>Providencia_rettgeri_DSM_1131</i>                       | 34004          | 27145     | 13.80          | 14.45            | 3.12            |                    |
|                                               | <i>Wolbachia_24169</i> Branch                              | 1354           | 25        | 0.76           | 0.46             | 1.11            |                    |
|                                               | <i>Helicobacter_cetorum_MIT_00_7128</i>                    | 3964           | 3220      | 4.02           | 4.11             | 0.7             |                    |
|                                               | <i>Helicobacter_pylori_16354</i> Branch                    | 148            | 133       | 4.23           | 4.93             | 0.6             |                    |
|                                               | <i>Staphylococcus_lentus_F1142</i>                         | 4758           | 4008      | 2.75           | 2.77             | 0.48            |                    |
|                                               | <i>Wolbachia_24159</i> Branch                              | 105            | 5         | 0.70           | 0.46             | 0.23            |                    |
| <i>Bacteroidetes_Phylum_25_127_597</i> Branch | 6                                                          | 6              | 4.14      | 4.14           | 0.16             |                 |                    |
| Abdomen                                       | <i>Wolbachia_pipientis_wBol1_b</i>                         | 271025         | 2219      | 21.57          | 56.13            | 57              |                    |
|                                               | <i>Providencia_rettgeri_DSM_1131</i>                       | 2312538        | 150809    | 76.68          | 78.86            | 27.14           |                    |
|                                               | <i>Wolbachia_endosymbiont_wVitB_of_Nasonia_vitripennis</i> | 24906          | 348       | 3.51           | 44.74            | 6.11            |                    |
|                                               | <i>Wolbachia_24168</i> Branch                              | 162            | 5         | 0.13           | 0.13             | 4.9             |                    |
|                                               | <i>Alcaligenes_faecalis</i>                                | 19221          | 14677     | 10.78          | 17.75            | 1.08            |                    |
|                                               | <i>Helicobacter_pylori_16354</i> Branch                    | 397            | 365       | 11.62          | 12.88            | 0.57            |                    |
|                                               | <i>Providencia_alcalifaciens_205_92</i>                    | 9614           | 1007      | 3.89           | 7.14             | 0.55            |                    |
|                                               | <i>Helicobacter_cetorum_MIT_00_7128</i>                    | 8879           | 6966      | 8.69           | 8.74             | 0.54            |                    |
|                                               | <i>Alcaligenes_sp_EGD_AK7</i>                              | 63             | 47        | 3.05           | 15.28            | 0.52            |                    |
|                                               | <i>Providencia_stuartii_strain_ATCC_33672</i>              | 20459          | 675       | 2.85           | 1.49             | 0.4             |                    |
|                                               | <i>Providencia_burhodogranariae_DSM_19968</i>              | 32261          | 857       | 0.44           | 0.49             | 0.21            |                    |
|                                               | <i>Staphylococcus_lentus_F1142</i>                         | 5103           | 4443      | 3.05           | 3.05             | 0.17            |                    |
|                                               | <i>Providencia_sneebia_DSM_19967</i>                       | 23675          | 816       | 0.45           | 0.51             | 0.17            |                    |
|                                               | <i>Proteus_mirabilis_strain_FDA_MicroDB_86</i>             | 7389           | 213       | 2.01           | 1.23             | 0.12            |                    |
|                                               | <i>Providencia_rustigianii_DSM_4541</i>                    | 15081          | 515       | 0.26           | 0.36             | 0.09            |                    |
|                                               | <i>Proteus_35886</i> Branch                                | 342            | 8         | 0.10           | 0.53             | 0.07            |                    |
| <i>Weeksella_sp_FF8</i>                       | 1766                                                       | 1598           | 1.08      | 1.10           | 0.06             |                 |                    |
| <i>Bacteroidetes_Phylum_25_127_597</i> Branch | 6                                                          | 6              | 4.14      | 4.14           | 0.05             |                 |                    |
| <i>Morganella_36472</i> Branch                | 195                                                        | 37             | 0.11      | 0.24           | 0.05             |                 |                    |
| Legs+Wings                                    | <i>Wolbachia_pipientis_wBol1_b</i>                         | 90380          | 2171      | 21.10          | 55.89            | 62.35           |                    |
|                                               | <i>Providencia_rettgeri_DSM_1131</i>                       | 111188         | 73674     | 37.46          | 39.17            | 10.21           |                    |
|                                               | <i>Helicobacter_pylori_16354</i> Branch                    | 566            | 490       | 15.60          | 17.10            | 7.21            |                    |
|                                               | <i>Wolbachia_endosymbiont_wVitB_of_Nasonia_vitripennis</i> | 8629           | 307       | 3.10           | 44.50            | 6.26            |                    |
|                                               | <i>Staphylococcus_lentus_F1142</i>                         | 49647          | 37882     | 25.97          | 26.04            | 6.09            |                    |
|                                               | <i>Helicobacter_cetorum_MIT_00_7128</i>                    | 12894          | 10226     | 12.75          | 12.83            | 2.61            |                    |
|                                               | <i>Weeksella_sp_FF8</i>                                    | 13355          | 11498     | 7.77           | 7.95             | 1.61            |                    |
|                                               | <i>Wolbachia_24169</i> Branch                              | 795            | 23        | 0.70           | 0.40             | 0.66            |                    |
|                                               | <i>Sphingobacterium_paucimobilis_HER1398</i>               | 5810           | 5417      | 2.76           | 2.76             | 0.5             |                    |
|                                               | <i>Providencia_alcalifaciens_R90_1475</i>                  | 703            | 413       | 1.50           | 2.40             | 0.42            |                    |
|                                               | <i>Alcaligenes_faecalis</i>                                | 1697           | 1579      | 1.16           | 1.92             | 0.41            |                    |
|                                               | <i>Dietzia_19977</i> Branch                                | 26             | 19        | 2.95           | 2.95             | 0.21            |                    |
